# Supplementary figures and images for: Visible-Light-Enhanced Antibacterial Activity of Silver and Copper Co-Doped Titania Formed on Titanium via Chemical and Thermal Treatments
Source: MDPI journal article supplement (doi:10.3390/molecules28020650), 2023-01-09

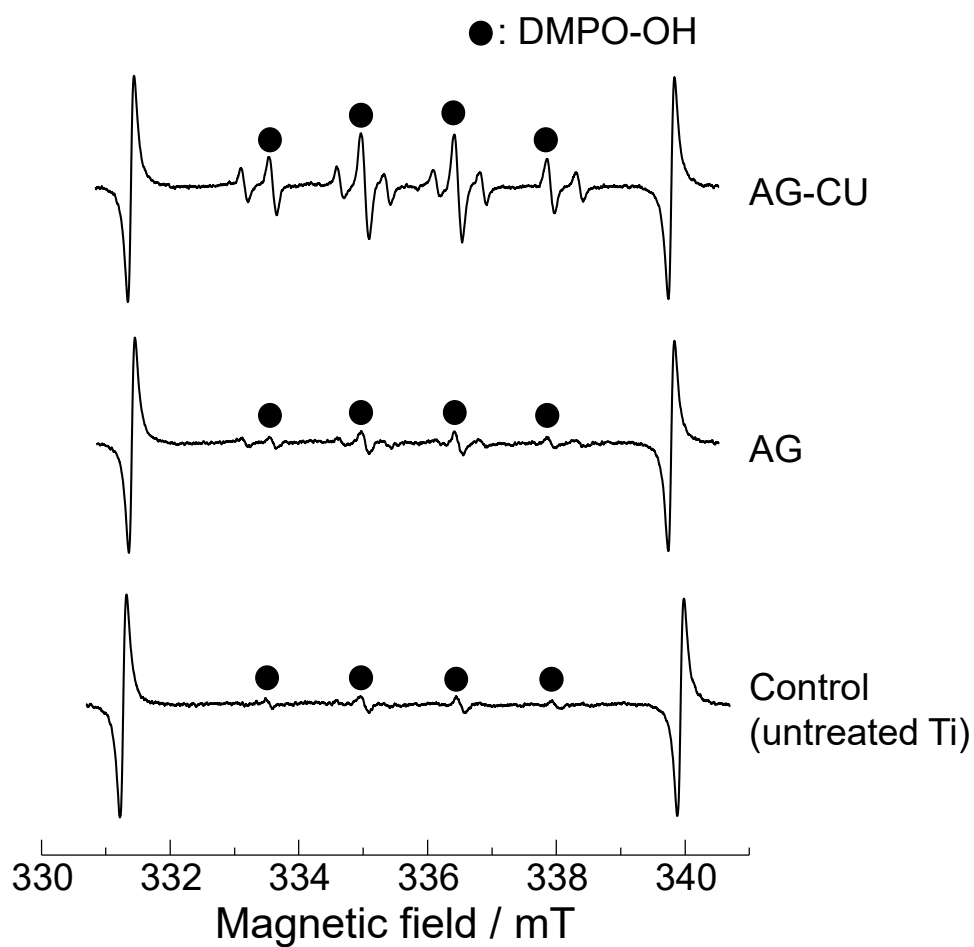

**Figure S1.** Electron spin resonance (ESR) spectra of control, AG, and AG-CU samples.

Supplement: s1 [file s1]
